# Supplementary material for: Structural dimension modulation in a new oxysulfide system of Ae2Sb2O2S3 (Ae = Ca and Ba)
Source: Royal Society of Chemistry journal article supplement (doi:10.1039/d2qi00698g), 2022-01-01
Supplement: d2qi00698g1.pdf [file d2qi00698g1.pdf]

## Supporting Information

# Structural Dimension Modulation in the New Oxysulfide System of $Ae_2Sb_2O_2S_3$ ( $Ae = Ca, Ba$ )

Ruiqi Wang,<sup>a</sup> Yantao Zhao,<sup>a</sup> Xian Zhang,<sup>\*,b</sup> and Fuqiang Huang,<sup>\*,a,c</sup>

<sup>a</sup> *Beijing National Laboratory for Molecular Sciences and State Key Laboratory of Rare Earth Materials Chemistry and Applications, College of Chemistry and Molecular Engineering, Peking University, Beijing 100871, P. R. China*

<sup>b</sup> *Qian Xuesen Laboratory of Space Technology, China Academy of Space Technology, Beijing, 100094 P. R. China*

<sup>c</sup> *State Key Laboratory of High-Performance Ceramics and Superfine Microstructure, Shanghai Institute of Ceramics, Chinese Academy of Sciences, Shanghai 200050, P. R. China*

**List of contents:**

**1. Supplementary figures**

**2. Supplementary tables**

1 1. Supplementary figures.

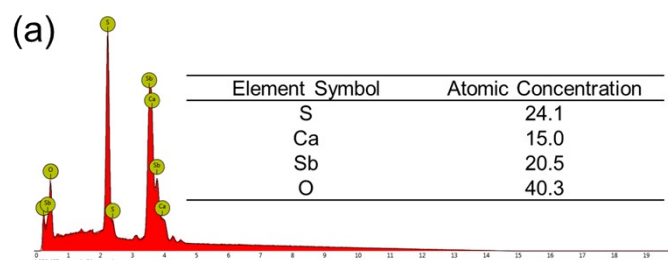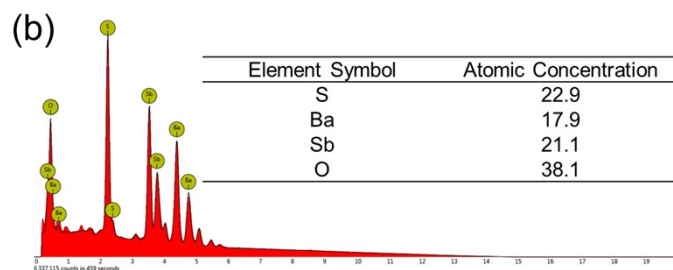

2

3 **Figure S1** EDS spectrum and element contents of (a)  $\text{Ca}_2\text{Sb}_2\text{O}_2\text{S}_3$  and (b)  $\text{Ba}_2\text{Sb}_2\text{O}_2\text{S}_3$ .

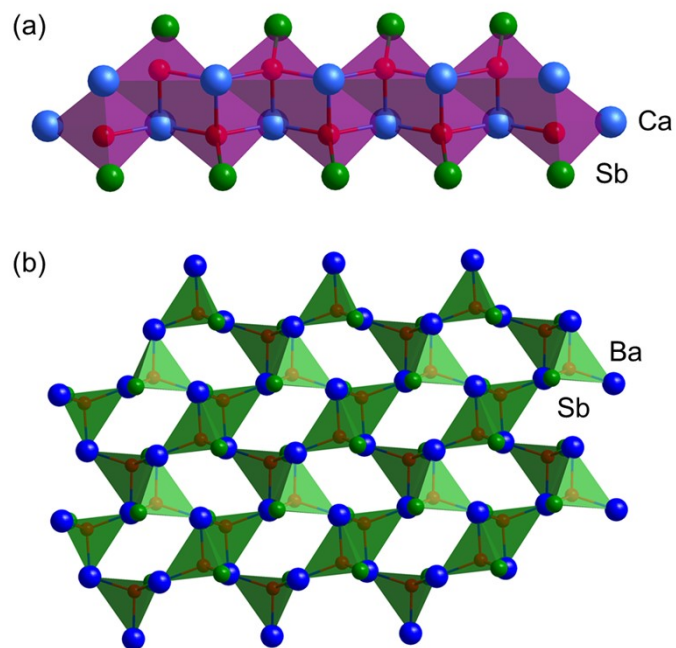

**Figure S2.** Oxygen coordination environments of (a)  $\text{Ca}_2\text{Sb}_2\text{O}_2\text{S}_3$  and (b)  $\text{Ba}_2\text{Sb}_2\text{O}_2\text{S}_3$ .

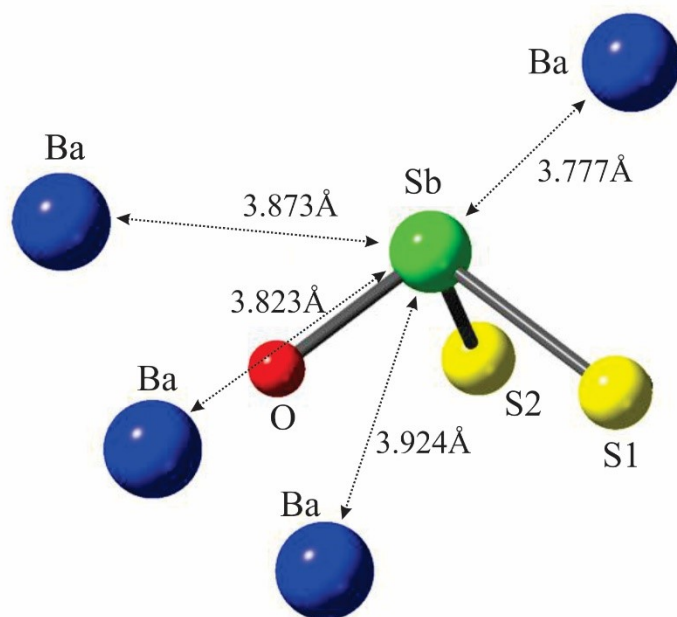

**Figure S3.** Coordination Sphere of Sb. All four Ba atoms are equivalent.

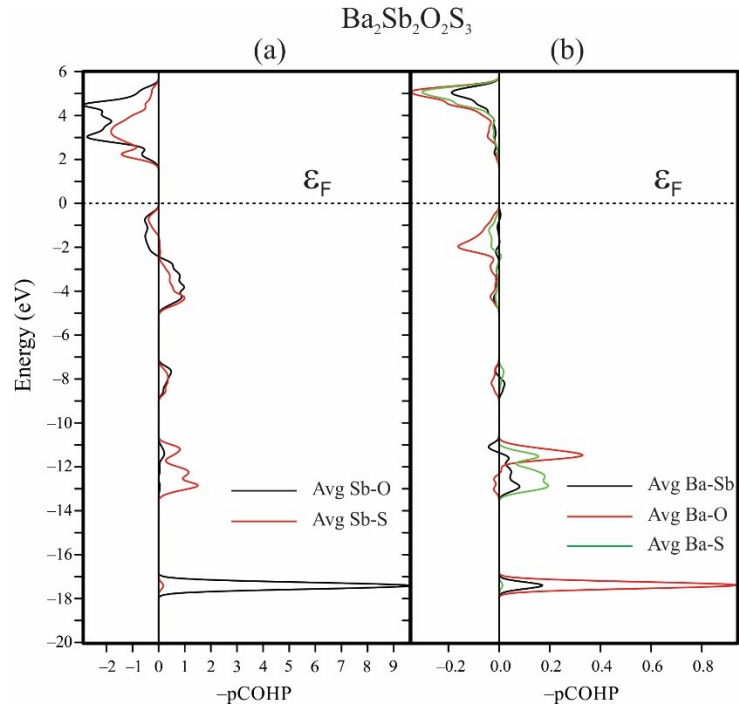

**Figure S4.** (a) The COHP curves of Sb–O, Sb–S, (b) Ba–Sb, Ba–O and Ba–S bond. The dotted horizontal line is the Fermi level.

## 2. Supplementary tables.

**Table S1.** Crystallographic data and details of the structure refinement of  $Ae_2Sb_2O_2S_3$  ( $Ae =$

| Formula                               | Ca, Ba)                                                       |                                                               |
|---------------------------------------|---------------------------------------------------------------|---------------------------------------------------------------|
|                                       | Ca <sub>2</sub> Sb <sub>2</sub> O <sub>2</sub> S <sub>3</sub> | Ba <sub>2</sub> Sb <sub>2</sub> O <sub>2</sub> S <sub>3</sub> |
| Space group                           | <i>C2/c</i>                                                   | <i>C2/c</i>                                                   |
| $F_w(\text{g}\cdot\text{mol}^{-1})$   | 451.84                                                        | 646.36                                                        |
| $a$ (Å)                               | 14.8616(7)                                                    | 16.0862(9)                                                    |
| $b$ (Å)                               | 4.0014(2)                                                     | 7.8909(5)                                                     |
| $c$ (Å)                               | 12.7811(6)                                                    | 7.1929(5)                                                     |
| $\beta$ (°)                           | 100.313(4)                                                    | 113.867(5)                                                    |
| $V(\text{Å}^3)$                       | 747.78(6)                                                     | 834.95(9)                                                     |
| crystal color                         | yellow                                                        | pale yellow                                                   |
| $\rho_c(\text{g}\cdot\text{cm}^{-3})$ | 4.013                                                         | 5.142                                                         |
| $\mu(\text{mm}^{-1})$                 | 9.351                                                         | 16.385                                                        |
| $F(000)$                              | 824                                                           | 1112                                                          |
| data/parameter                        |                                                               | 1052/42                                                       |
| s                                     | 995/42                                                        |                                                               |
| $R_{\text{int}}$                      | 0.0195                                                        | 0.0182                                                        |
| $RI[I > 2\sigma(I)]$                  | 0.0111                                                        | 0.0144                                                        |
| $wR_2$ (all data)                     | 0.0259                                                        | 0.0328                                                        |
| GOF                                   | 1.124                                                         | 1.079                                                         |

$$R = \frac{\sum ||F_o| - |F_c||}{\sum |F_o|}, \quad wR = \frac{\sum \{ [w(|F_o|^2 - |F_c|^2)^2] / \sum [w(|F_o|^4)] \}^{1/2}}{\quad} \quad \text{and} \quad w =$$

$$1 / [\sigma^2(F_o^2) + (0.0114P)^2 + 0.0699P] \quad \text{for } A = \text{Ca}, \quad \text{and} \quad w = 1 / [\sigma^2(F_o^2) + (0.0135P)^2] \quad \text{for } A = \text{Ba},$$

$$\text{where } P = (F_o^2 + 2F_c^2) / 3$$

**Table S2.** Selected bond lengths and angles for  $Ae_2Sb_2O_2S_3$  ( $Ae = Ca, Ba$ )

| $Ca_2Sb_2O_2S_3$ |              | $Ba_2Sb_2O_2S_3$ |              |
|------------------|--------------|------------------|--------------|
| bond type        | distance (Å) | bond type        | distance (Å) |
| Sb–S1            | 2.6076(4)    | Sb–S1            | 2.6122(8)    |
| Sb–S1            | 3.0566(5)    | Sb–S2            | 2.4148(8)    |
| Sb–S2            | 2.4785(4)    | Sb–O1            | 1.932(2)     |
| Sb–S2            | 3.0070(5)    | Ba–S1            | 3.4379(6)    |
| Sb–O1            | 1.966(2)     | Ba–S1            | 3.4934(4)    |
| Ca–S1            | 2.9678(4)    | Ba–S2            | 3.3139(7)    |
| Ca–S2            | 3.0596(5)    | Ba–S2            | 3.4696(8)    |
| Ca–S2            | 2.8620(5)    | Ba–S2            | 3.2458(8)    |
| Ca–O1            | 2.350(1)     | Ba–S2            | 3.4617(8)    |
| Ca–O1            | 2.322(1)     |                  |              |
| Ca–O1            | 2.363(1)     |                  |              |

  

| $Ca_2Sb_2O_2S_3$ |           | $Ba_2Sb_2O_2S_3$ |           |
|------------------|-----------|------------------|-----------|
| angle type       | angle (°) | angle type       | angle (°) |
| O1–Sb–S1         | 87.05(3)  | O1–Sb–S1         | 96.94(7)  |
| O1–Sb–S2         | 89.85(3)  | O1–Sb–S2         | 94.56(7)  |
| O1–Sb–S1         | 78.83(3)  | S1–Sb–S2         | 94.59(2)  |
| O1–Sb–S2         | 81.17(4)  |                  |           |
| S1–Sb–S2         | 97.22(3)  |                  |           |
| S1–Sb–S1         | 89.528(4) |                  |           |
| S2–Sb–S2         | 93.18(2)  |                  |           |



**Table S3.** Atomic coordinates and equivalent isotropic displacement parameters ( $\text{\AA}^2$ ) of  $\text{Ca}_2\text{Sb}_2\text{O}_2\text{S}_3$  at 180 K

| Label     | x          | y            | z          | Occupancy | $U_{\text{eq}}^*$ |
|-----------|------------|--------------|------------|-----------|-------------------|
| <b>Sb</b> | 0.56554(2) | 0.35092(3)   | 0.62702(2) | 1         | 0.00626(5)        |
| <b>Ca</b> | 0.69871(2) | 0.90271(8)   | 0.83792(2) | 1         | 0.00616(7)        |
| <b>S</b>  | 0.5        | -0.06966(14) | 0.75       | 1         | 0.00681(10)       |
| <b>S</b>  | 0.65424(3) | -0.05856(10) | 0.54120(3) | 1         | 0.00824(8)        |
| <b>O</b>  | 0.67046(7) | 0.4068(3)    | 0.74341(9) | 1         | 0.0062(2)         |

\* $U_{\text{eq}}$  is defined as one third of the trace of the orthogonalized  $U_{ij}$  tensor.

**Table S4.** Atomic coordinates and equivalent isotropic displacement parameters ( $\text{\AA}^2$ ) of  $\text{Ba}_2\text{Sb}_2\text{O}_2\text{S}_3$  at 180 K

| Label     | x           | y           | z           | Occupancy | $U_{\text{eq}}^*$ |
|-----------|-------------|-------------|-------------|-----------|-------------------|
| <b>Ba</b> | 0.17774(2)  | 0.34732(2)  | 0.21999(3)  | 1         | 0.00649(6)        |
| <b>Sb</b> | 0.06426(2)  | 0.79591(3)  | 0.07709(3)  | 1         | 0.00669(6)        |
| <b>S</b>  | 0           | 0.57037(14) | 0.25        | 1         | 0.0078(2)         |
| <b>S</b>  | 0.35316(5)  | 0.45050(10) | 0.11276(12) | 1         | 0.00823(15)       |
| <b>O</b>  | 0.16854(15) | 0.6668(3)   | 0.0901(3)   | 1         | 0.0077(4)         |

\* $U_{\text{eq}}$  is defined as one third of the trace of the orthogonalized  $U_{ij}$  tensor.

**Table S5.** Anisotropic displacement parameters ( $\text{\AA}^2$ ) of  $\text{Ca}_2\text{Sb}_2\text{O}_2\text{S}_3$  at 180 K

| Label | $U_{11}$    | $U_{22}$    | $U_{33}$    | $U_{12}$     | $U_{13}$    | $U_{23}$    |
|-------|-------------|-------------|-------------|--------------|-------------|-------------|
| Sb1   | 0.00540(7)  | 0.00704(7)  | 0.00583(7)  | -0.00033(3)  | -0.00033(4) | 0.00060(3)  |
| Ca1   | 0.00629(14) | 0.00585(14) | 0.00662(15) | 0.00002(11)  | 0.00193(11) | 0.00048(11) |
| S1    | 0.0059(2)   | 0.0063(2)   | 0.0086(2)   | 0            | 0.00242(18) | 0           |
| S2    | 0.01015(18) | 0.00818(18) | 0.00683(17) | -0.00059(13) | 0.00270(13) | 0.00070(15) |
| O1    | 0.0051(5)   | 0.0070(5)   | 0.0058(5)   | 0.0002(4)    | -0.0006(4)  | 0.0003(4)   |

**Table S6.** Anisotropic displacement parameters ( $\text{\AA}^2$ ) of  $\text{Ba}_2\text{Sb}_2\text{O}_2\text{S}_3$  at 180 K

| Label | $U_{11}$    | $U_{22}$    | $U_{33}$    | $U_{12}$    | $U_{13}$   | $U_{23}$   |
|-------|-------------|-------------|-------------|-------------|------------|------------|
| Ba1   | 0.00709(10) | 0.00600(10) | 0.00675(10) | 0.00065(7)  | 0.00320(8) | 0.00047(6) |
| Sb1   | 0.00570(10) | 0.00710(12) | 0.00692(11) | -0.00043(8) | 0.00218(8) | 0.00109(7) |
| S1    | 0.0091(5)   | 0.0065(5)   | 0.0096(5)   | 0           | 0.0056(4)  | 0          |
| S2    | 0.0103(3)   | 0.0077(3)   | 0.0078(3)   | 0.0022(3)   | 0.0047(3)  | 0.0010(3)  |
| O1    | 0.0071(10)  | 0.0066(11)  | 0.0095(11)  | -0.0003(9)  | 0.0037(9)  | 0.0011(8)  |
